# Supplementary material for: Hydroxychloroquine (HCQ) decreases the benefit of anti-PD-1 immune checkpoint blockade in tumor immunotherapy
Source: PubMed Central journal article supplement (PMC8238207; doi:10.1371/journal.pone.0251731), 2021-06-28
Supplement: pone.0251731.s001.pdf [file pone.0251731.s001.pdf]

Figure S1

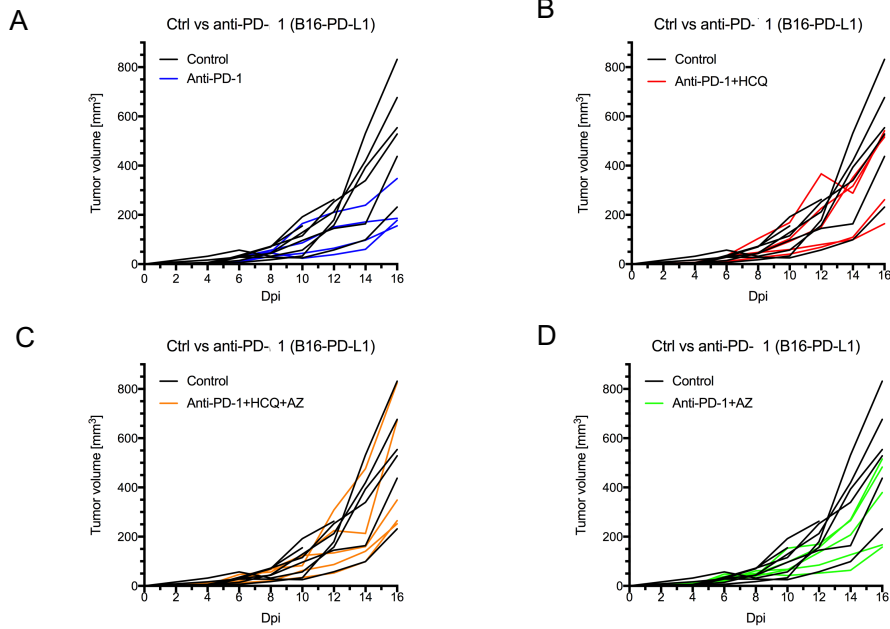

**Figure S1: Spider graphs representing the effects of HCQ and AZ on immune checkpoint blockade in cancer therapy.** C57BL/6 mice were implanted with B16 tumoral cells as described above in Figure 1.  
**Panel A:** Tumor growths in control vs anti-PD-1 vs anti-PD-1 + HCQ vs anti-PD-1 + AZ vs anti-PD-1 + HCQ + AZ.  
**Panel B:** Spider graph representing control vs anti-PD-1.  
**Panel C:** Spider graph representing control vs anti-PD-1 + HCQ.  
**Panel D:** Spider graph representing control vs anti-PD-1 + HCQ + AZ.  
**Panel E:** Spider graph representing control vs anti-PD-1 + AZ.
