# Supplementary material for: Hydroxychloroquine (HCQ) decreases the benefit of anti-PD-1 immune checkpoint blockade in tumor immunotherapy
Source: PubMed Central journal article supplement (PMC8238207; doi:10.1371/journal.pone.0251731), 2021-06-28
Supplement: pone.0251731.s002.pdf [file pone.0251731.s002.pdf]

Figure S2

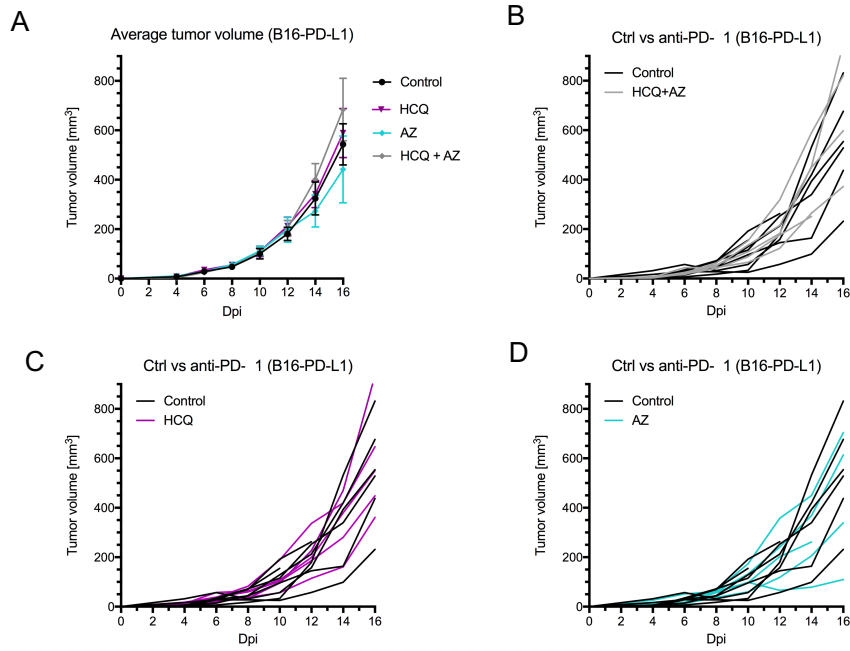

**Figure S2: Spider graphs representing the effects of HCQ and AZ in control groups.** C57BL/6 mice were implanted with B16 tumoral cells as described above in Figure 1.

**Panel A:** Tumor growths in control vs HCQ vs AZ vs HCQ + AZ.

**Panel B:** Spider graph representing control vs HCQ + AZ.

**Panel C:** Spider graph representing control vs HCQ.

**Panel D:** Spider graph representing control vs AZ.
