# Supplementary material for: Hydroxychloroquine (HCQ) decreases the benefit of anti-PD-1 immune checkpoint blockade in tumor immunotherapy
Source: PubMed Central journal article supplement (PMC8238207; doi:10.1371/journal.pone.0251731), 2021-06-28
Supplement: pone.0251731.s003.pdf [file pone.0251731.s003.pdf]

Figure S3

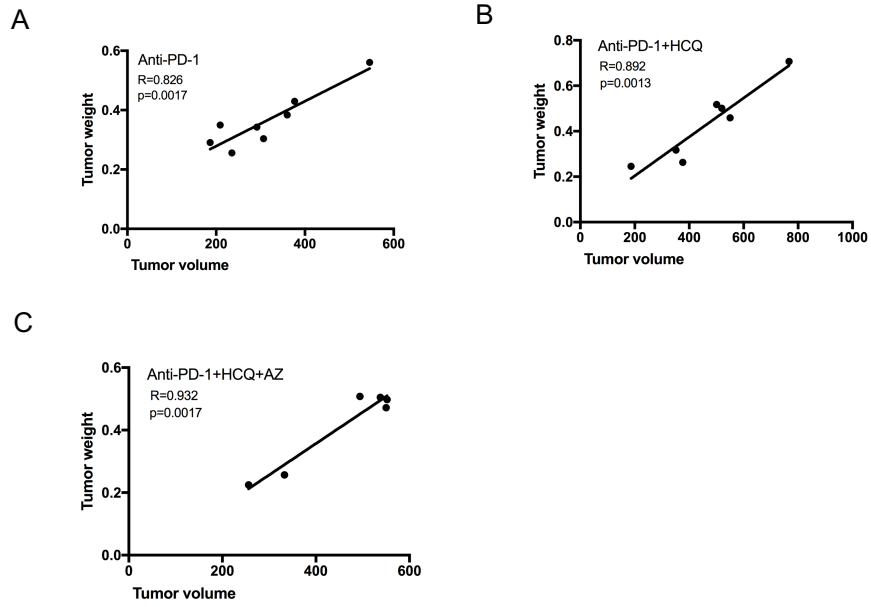

**Figure S3: Correlation between tumor weight and tumor volume in response to treatments**

**Panel A:** Anti-PD-1

**Panel B:** Anti-PD-1 + HCQ

**Panel C:** Anti-PD-1 + HCQ/AZ
