# Supplementary material for: Hydroxychloroquine (HCQ) decreases the benefit of anti-PD-1 immune checkpoint blockade in tumor immunotherapy
Source: PubMed Central journal article supplement (PMC8238207; doi:10.1371/journal.pone.0251731), 2021-06-28
Supplement: pone.0251731.s004.pdf [file pone.0251731.s004.pdf]

Figure S4

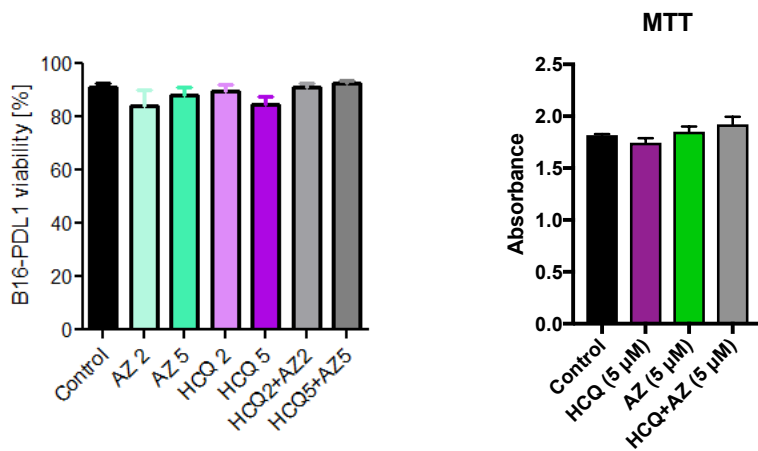

**Figure S4: HCQ and AZ do not inhibit the in vitro growth of B16 melanoma cells**

**Left panel:** Viability of B16 cells after a 24 incubation with 2 and 5µM AZ or HCQ or in combination as determined by trypan blue exclusion.

**Right panel:** Viability and metabolism of B16 cells as determined by an MTT assay. The MTT assay is a colorimetric assay for assessing cell metabolic activity. NAD (P)H-dependent cellular oxidoreductase enzymes can also reflect the number of viable cells.
