# Supplementary material for: Hydroxychloroquine (HCQ) decreases the benefit of anti-PD-1 immune checkpoint blockade in tumor immunotherapy
Source: PubMed Central journal article supplement (PMC8238207; doi:10.1371/journal.pone.0251731), 2021-06-28
Supplement: pone.0251731.s005.pdf [file pone.0251731.s005.pdf]

Figure S5

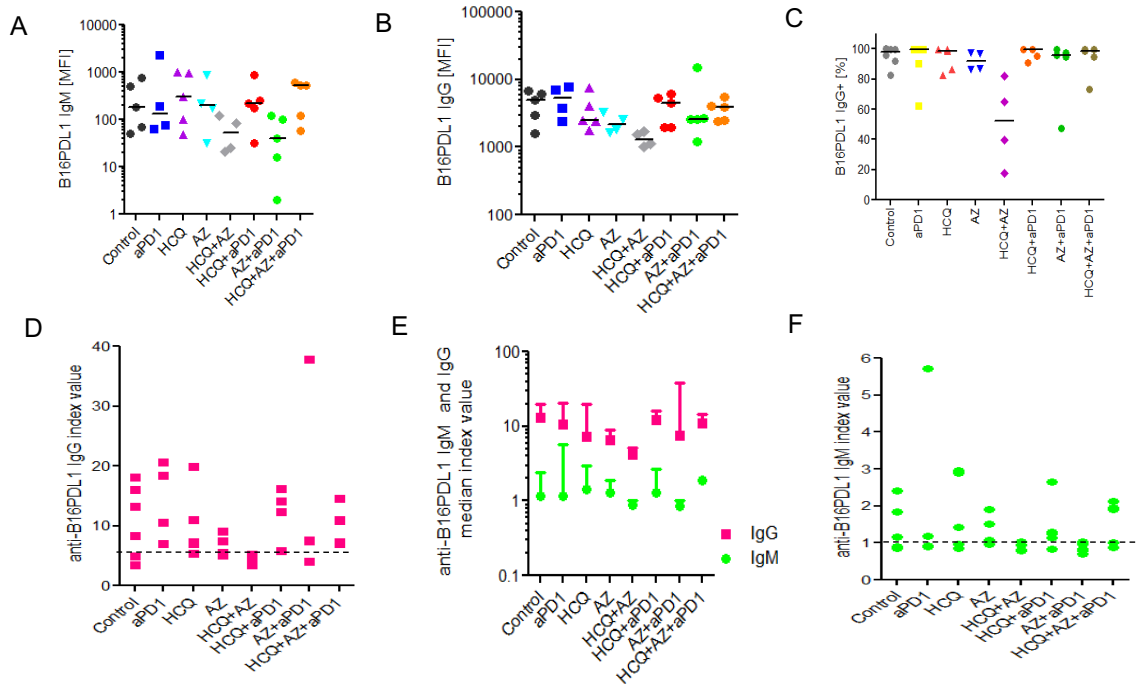

**Figure S5: The effect of HCQ and AZ on the production of subclasses of immunoglobulin against PD L-1. Serum IG levels were measured in response to anti-PD-1 and HCQ or AZ.**

**Panel A:** IgM levels (MFI)

**Panel B:** IgG levels (MFI)

**Panel C:** IgG levels (%)

**Panel D:** IgG levels (index value)

**Panel E:** IgM and IgG (median index value)

**Panel F:** IgM (index value).
