# Supplementary material for: Hydroxychloroquine (HCQ) decreases the benefit of anti-PD-1 immune checkpoint blockade in tumor immunotherapy
Source: PubMed Central journal article supplement (PMC8238207; doi:10.1371/journal.pone.0251731), 2021-06-28
Supplement: pone.0251731.s006.pdf [file pone.0251731.s006.pdf]

Figure S6

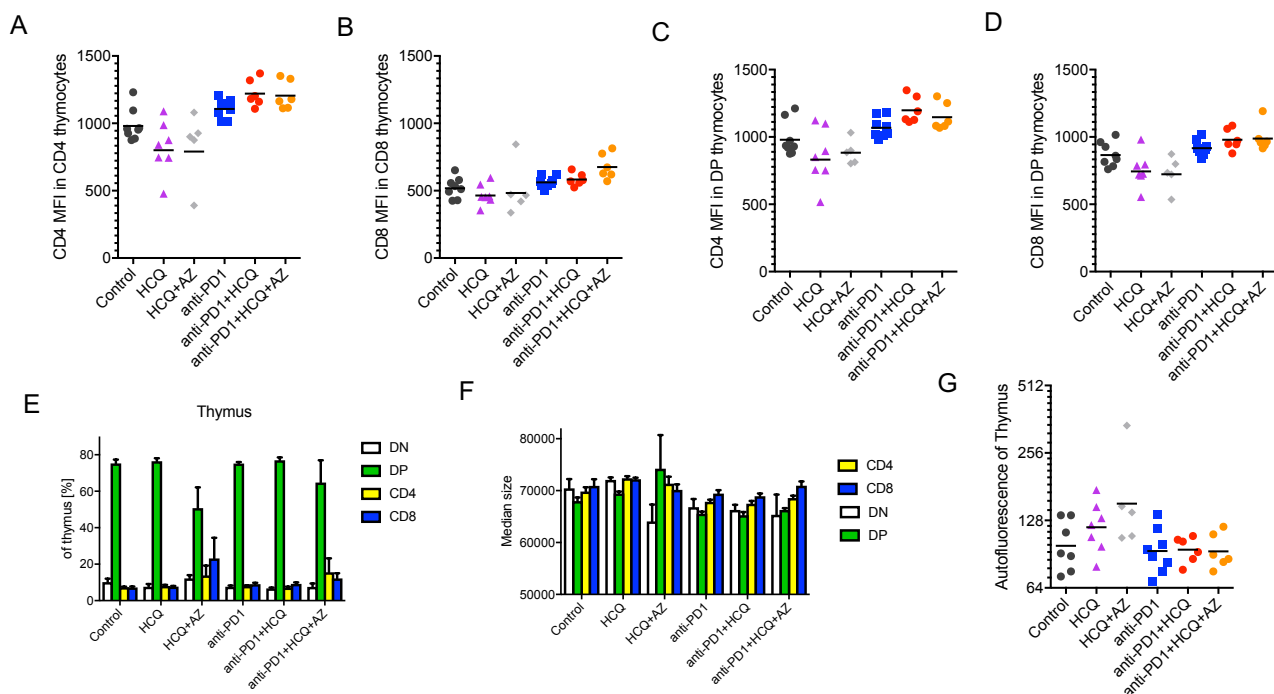

**Figure S6: The effect of HCQ ad AZ on the cellularity of thymic subsets**

**Panel A:** CD4 MFI on CD4+ thymocytes

**Panel B:** CD8 MFI on CD8+ thymocytes

**Panel C:** CD4 MFI on double positive (CD4 and CD8+) DP thymic subsets

**Panel D:** CD8 MFI on double positive (CD4 and CD8+) DP thymic subsets

**Panel E:** Percent representation of thymic subsets in response to anti-PD-1, HCQ and HCQ/AZ

**Panel F:** Medium size representation of thymic subsets in response to anti-PD-1, HCQ and HCQ/AZ

**Panel G:** HCQ uptake on thymocytes
